# Supplementary material
Source: PubMed Central journal article supplement (PMC7218410)
Supplement: NIHMS1582422-supplement-SupMaterial.pdf [file NIHMS1582422-supplement-SupMaterial.pdf]

## LEGENDS TO SUPPLEMENTARY FIGURES:

**Figure S 1.** Boxplots of the prediction for TFP and GEM as single agents and for the interaction TFP-GEM for joint inhibition and competitive inhibition with  $\psi$  applied to TFP and GEM IC50 values.

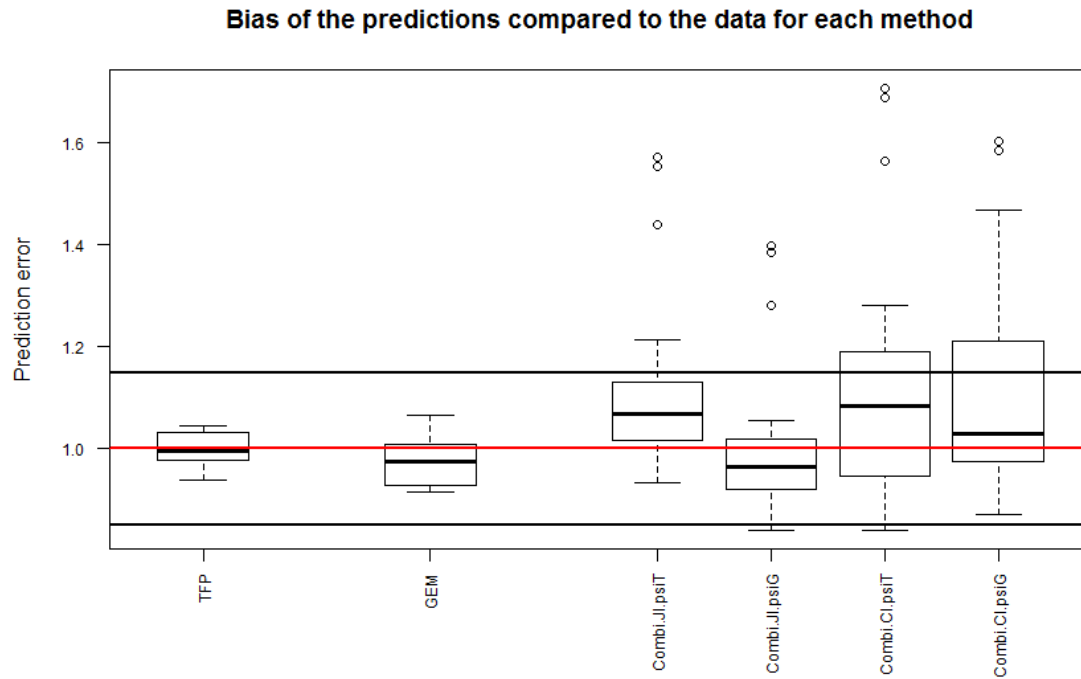

**Figure S 2.** Boxplots of the prediction for TFP and PTX as single agents and for the interaction TFP-PTX for joint inhibition and competitive inhibition with  $\psi$  applied to TFP and PTX IC50 values.

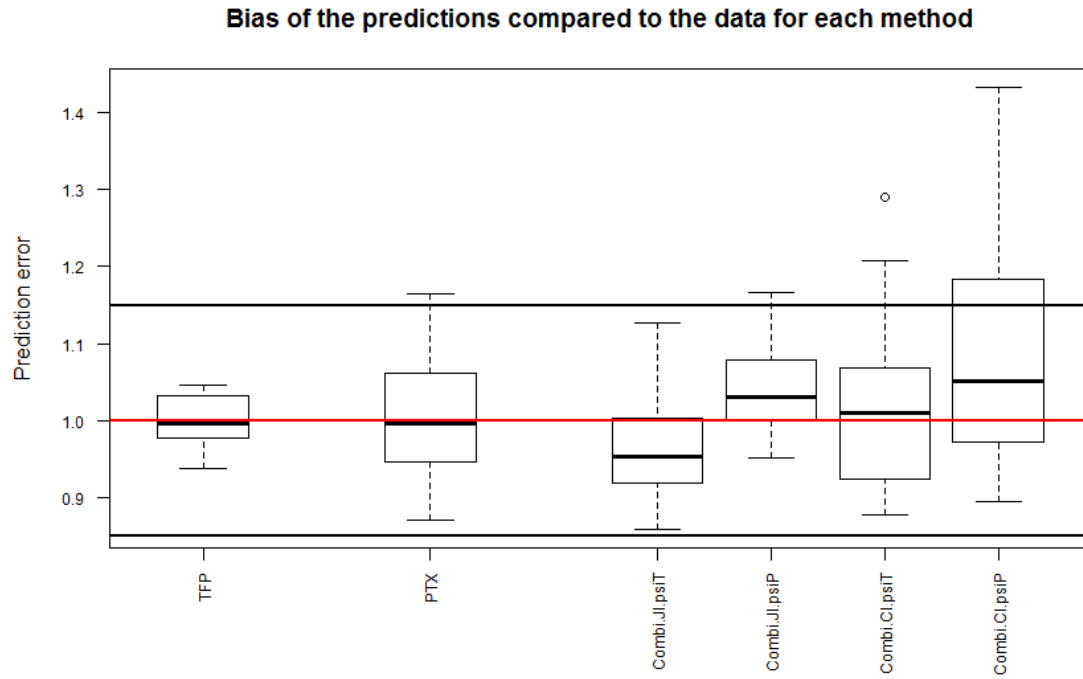

**Figure S 3.** Boxplots of the prediction for GEM and PTX as single agents and for the interaction TFP-GEM for joint inhibition and competitive inhibition with  $\psi$  applied to GEM and PTX IC50 values.

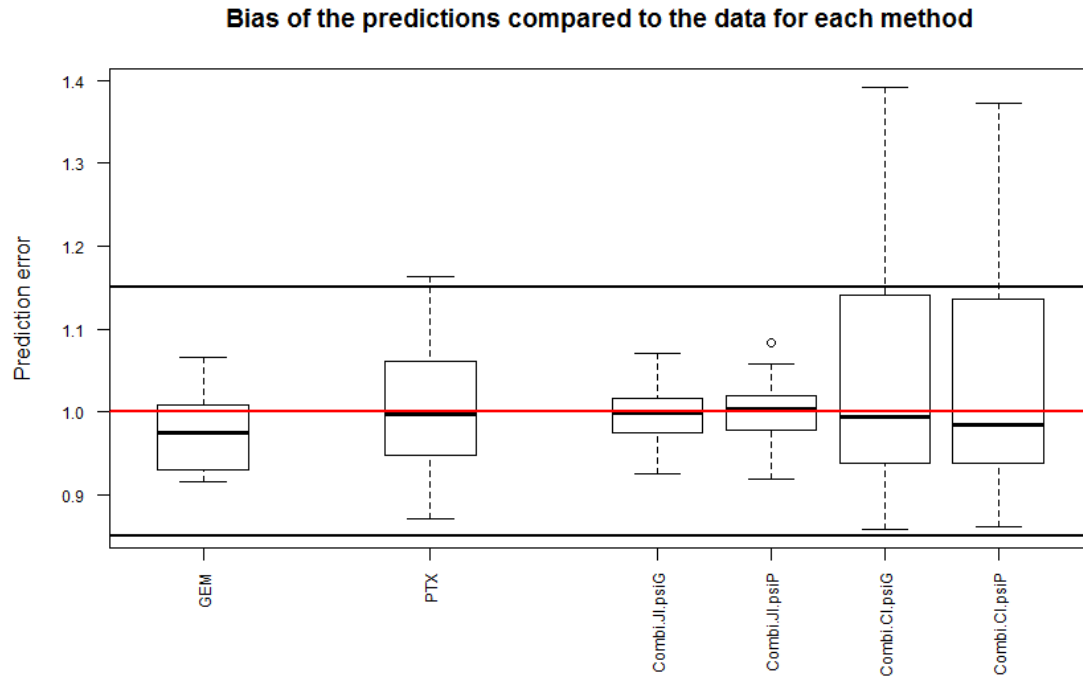

**Figure S 4.** Boxplots of the prediction for TFP, GEM and PTX as single agents and for the interaction TFP-GEM-PTX for joint inhibition and competitive inhibition with  $\psi$  applied to TFP, GEM and PTX IC50 values.

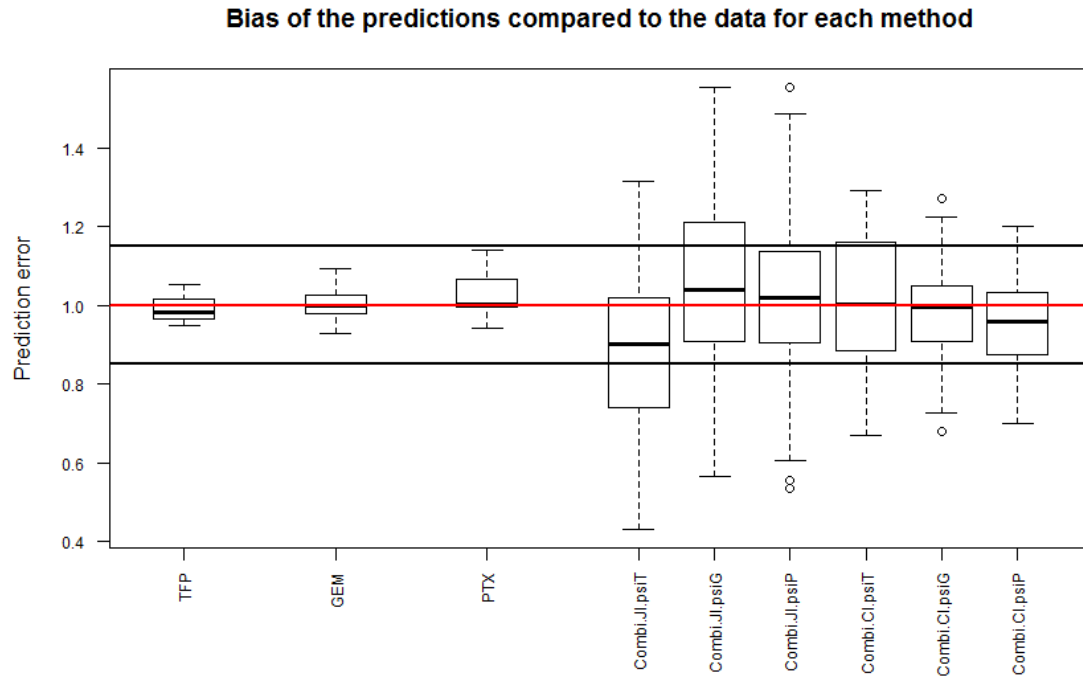

**Figure S 5.** Schematic representation of the mechanism of action of gemcitabine.

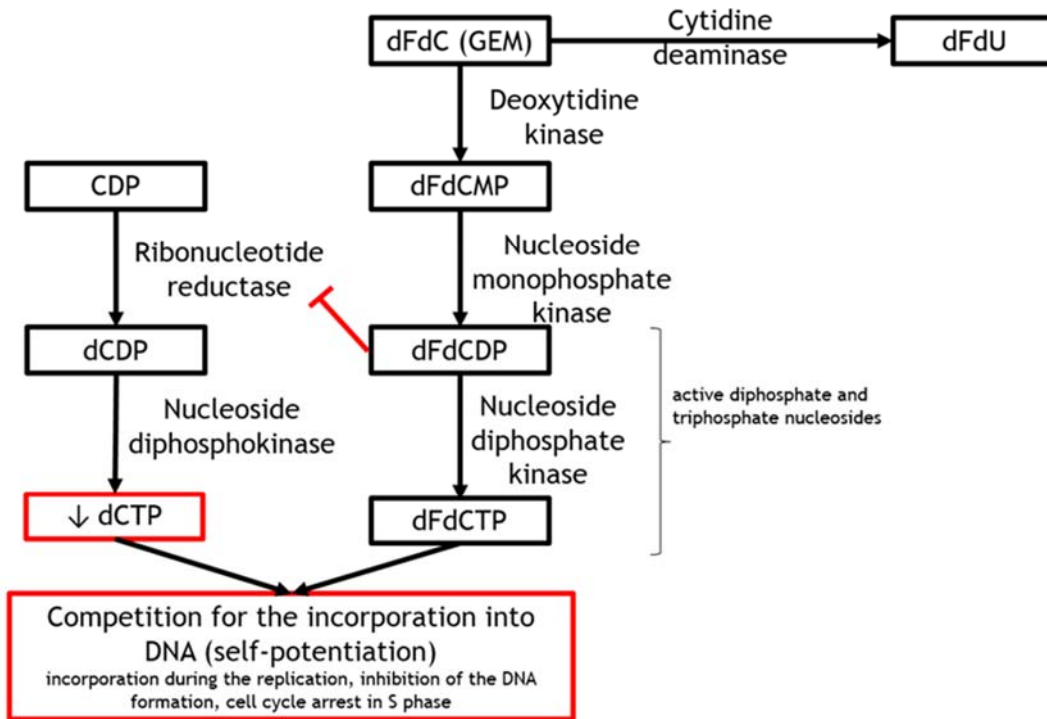

## SUPPLEMENTARY MATERIALS

**Table S I:** Mean differences in percentages of cells between the data and the additive surface and mean differences between the data and the theoretical percentages of cells for the interaction trifluoperazine-gemcitabine

| TFP (nM) | GEM (nM) | Joint inhibition      |                       | Competitive inhibition |                       | Difference between the data and the theoretical percentages of cells |
|----------|----------|-----------------------|-----------------------|------------------------|-----------------------|----------------------------------------------------------------------|
|          |          | $\Psi$ applied to TFP | $\Psi$ applied to GEM | $\Psi$ applied to TFP  | $\Psi$ applied to GEM |                                                                      |
| 4768     | 10.16    | 2.18                  | 4.85                  | -0.0183                | 2.73                  | 9.58                                                                 |
| 8123     | 10.16    | 7.20                  | 9.40                  | 2.87                   | 5.23                  | 18.6                                                                 |
| 12620    | 10.16    | 1.31                  | 2.92                  | -4.40                  | -2.58                 | 13.2                                                                 |
| 4768     | 14.9     | -4.40                 | -2.25                 | -7.85                  | -5.57                 | 1.71                                                                 |
| 8123     | 14.9     | -0.873                | 0.897                 | -7.94                  | -5.91                 | 8.44                                                                 |
| 12620    | 14.9     | -1.90                 | -0.610                | -11.8                  | -10.1                 | 7.73                                                                 |
| 4768     | 20.46    | -4.37                 | -2.70                 | -8.31                  | -6.50                 | 1.79                                                                 |
| 8123     | 20.46    | -11.6                 | -10.2                 | -20.0                  | -18.3                 | -3.31                                                                |
| 12620    | 20.46    | 0.699                 | 1.71                  | -11.8                  | -10.3                 | 8.90                                                                 |

**Table S II:** Mean differences in percentages of cells between the data and the additive surface and mean differences between the data and the theoretical percentages of cells for the interaction trifluoperazine-paclitaxel

| TFP (nM) | PTX (nM) | Joint inhibition      |                       | Competitive inhibition |                       | Difference between the data and the theoretical percentages of cells |
|----------|----------|-----------------------|-----------------------|------------------------|-----------------------|----------------------------------------------------------------------|
|          |          | $\Psi$ applied to TFP | $\Psi$ applied to PTX | $\Psi$ applied to TFP  | $\Psi$ applied to PTX |                                                                      |
| 4768     | 5.155    | 4.74                  | 7.77                  | 1.74                   | 4.90                  | 10.1                                                                 |
| 8123     | 5.155    | 4.02                  | 6.52                  | -1.98                  | 0.778                 | 13.8                                                                 |
| 12620    | 5.155    | -2.41                 | -0.575                | -10.5                  | -8.33                 | 8.21                                                                 |
| 4768     | 6.467    | 6.96                  | 9.36                  | 3.13                   | 5.69                  | 10.8                                                                 |
| 8123     | 6.467    | 7.60                  | 9.57                  | -0.362                 | 1.95                  | 15.0                                                                 |
| 12620    | 6.467    | 2.30                  | 3.75                  | -9.05                  | -7.11                 | 10.5                                                                 |
| 4768     | 7.80     | 0.665                 | 2.55                  | -3.31                  | -1.26                 | 5.91                                                                 |
| 8123     | 7.80     | 3.82                  | 5.37                  | -4.71                  | -2.79                 | 11.3                                                                 |
| 12620    | 7.80     | 1.74                  | 2.88                  | -11.1                  | -9.37                 | 9.29                                                                 |

**Table S III:** Mean differences in percentages of cells between the data and the additive surface and mean differences between the data and the theoretical percentages of cells for the interaction gemcitabine-paclitaxel

| GEM (nM) | PTX (nM) | Joint inhibition      |                       | Competitive inhibition |                       | Difference between the data and the theoretical percentages of cells |
|----------|----------|-----------------------|-----------------------|------------------------|-----------------------|----------------------------------------------------------------------|
|          |          | $\Psi$ applied to GEM | $\Psi$ applied to PTX | $\Psi$ applied to GEM  | $\Psi$ applied to PTX |                                                                      |
| 10.16    | 5.155    | 1.55                  | 0.868                 | -3.22                  | -3.96                 | -9.09                                                                |
| 10.16    | 6.467    | 0.405                 | -0.137                | -5.70                  | -6.31                 | -8.42                                                                |
| 10.16    | 7.80     | -0.557                | -0.984                | -6.81                  | -7.31                 | -5.14                                                                |
| 14.9     | 5.155    | 0.929                 | 0.377                 | -6.80                  | -7.45                 | -7.46                                                                |
| 14.9     | 6.467    | 3.02                  | 2.58                  | -7.41                  | -7.96                 | -3.95                                                                |
| 14.9     | 7.80     | 0.960                 | 0.617                 | -10.2                  | -10.7                 | -2.63                                                                |
| 20.46    | 5.155    | 0.543                 | 0.113                 | -8.46                  | -8.99                 | -4.54                                                                |
| 20.46    | 6.467    | 0.904                 | 0.564                 | -11.9                  | -12.4                 | -3.37                                                                |
| 20.46    | 7.80     | 1.21                  | 0.946                 | -13.4                  | -13.8                 | -0.718                                                               |



**Table S IV:** Mean differences in percentages of cells between the data and the additive surface and mean differences between the data and the theoretical percentages of cells for the interaction trifluoperazine-gemcitabine-paclitaxel

| TFP (nM) | GEM (nM) | PTX (nM) | $\Psi$ applied to | Joint inhibition |       |       | Competitive inhibition |       |       | Difference between the data and the theoretical percentages of cells |
|----------|----------|----------|-------------------|------------------|-------|-------|------------------------|-------|-------|----------------------------------------------------------------------|
|          |          |          |                   | TFP              | GEM   | PTX   | TFP                    | GEM   | PTX   |                                                                      |
| 4768     | 10.16    | 5.155    |                   | -9.31            | -9.29 | -9.31 | -17.1                  | -17.1 | -17.1 | -14.9                                                                |
| 4768     | 10.16    | 6.467    |                   | -1.81            | -1.79 | -1.81 | -11.6                  | -11.5 | -11.6 | -9.42                                                                |
| 4768     | 10.16    | 7.80     |                   | -1.00            | -0.99 | -1.00 | -10.8                  | -10.7 | -10.8 | -7.19                                                                |
| 8123     | 10.16    | 5.155    |                   | 2.99             | 3.00  | 2.99  | -7.91                  | -7.88 | -7.91 | -1.08                                                                |
| 8123     | 10.16    | 6.467    |                   | 4.63             | 4.64  | 4.63  | -7.90                  | -7.88 | -7.90 | -0.614                                                               |
| 8123     | 10.16    | 7.80     |                   | 6.12             | 6.13  | 6.12  | -5.64                  | -5.63 | -5.64 | 1.93                                                                 |
| 12620    | 10.16    | 5.155    |                   | 3.14             | 3.15  | 3.14  | -8.05                  | -8.04 | -8.05 | 0.728                                                                |
| 12620    | 10.16    | 6.467    |                   | 8.23             | 8.24  | 8.23  | -5.15                  | -5.14 | -5.15 | 4.96                                                                 |
| 12620    | 10.16    | 7.80     |                   | 6.92             | 6.94  | 6.92  | -2.35                  | -2.32 | -2.35 | 4.69                                                                 |
| 4768     | 14.9     | 5.155    |                   | -2.77            | -2.75 | -2.77 | -13.1                  | -13.0 | -13.1 | -9.22                                                                |
| 4768     | 14.9     | 6.467    |                   | 1.65             | 1.67  | 1.65  | -11.5                  | -11.4 | -11.5 | -5.94                                                                |
| 4768     | 14.9     | 7.80     |                   | 4.47             | 4.47  | 4.47  | -8.77                  | -8.75 | -8.77 | -2.59                                                                |
| 8123     | 14.9     | 5.155    |                   | 0.972            | 0.986 | 0.972 | -11.9                  | -11.9 | -11.9 | -3.34                                                                |
| 8123     | 14.9     | 6.467    |                   | 5.94             | 5.95  | 5.94  | -9.32                  | -9.30 | -9.32 | 0.642                                                                |
| 8123     | 14.9     | 7.80     |                   | 5.61             | 5.62  | 5.61  | -9.65                  | -9.63 | -9.65 | 0.614                                                                |
| 12620    | 14.9     | 5.155    |                   | 3.84             | 3.85  | 3.84  | -9.41                  | -9.39 | -9.41 | 1.22                                                                 |
| 12620    | 14.9     | 6.467    |                   | 6.84             | 6.84  | 6.84  | -8.63                  | -8.62 | -8.63 | 3.50                                                                 |
| 12620    | 14.9     | 7.80     |                   | 9.41             | 9.41  | 9.41  | -6.46                  | -6.45 | -6.46 | 6.21                                                                 |
| 4768     | 20.46    | 5.155    |                   | 2.61             | 2.62  | 2.61  | -8.09                  | -8.08 | -8.09 | -3.58                                                                |
| 4768     | 20.46    | 6.467    |                   | 6.45             | 6.46  | 6.45  | -7.75                  | -7.74 | -7.75 | -0.247                                                               |
| 4768     | 20.46    | 7.80     |                   | 7.93             | 7.94  | 7.93  | -7.31                  | -7.30 | -7.31 | 1.94                                                                 |
| 8123     | 20.46    | 5.155    |                   | 4.88             | 4.89  | 4.88  | -8.68                  | -8.66 | -8.68 | 0.626                                                                |
| 8123     | 20.46    | 6.467    |                   | 7.31             | 7.32  | 7.31  | -8.82                  | -8.81 | -8.82 | 2.59                                                                 |
| 8123     | 20.46    | 7.80     |                   | 10.03            | 10.03 | 10.03 | -6.65                  | -6.64 | -6.65 | 5.75                                                                 |
| 12620    | 20.46    | 5.155    |                   | 9.82             | 9.83  | 9.82  | -4.84                  | -4.83 | -4.84 | 7.17                                                                 |
| 12620    | 20.46    | 6.467    |                   | 9.76             | 9.77  | 9.76  | -6.77                  | -6.76 | -6.77 | 6.75                                                                 |
| 12620    | 20.46    | 7.80     |                   | 10.7             | 10.7  | 10.7  | -6.23                  | -6.22 | -6.23 | 7.96                                                                 |

## Supplementary materials: Adapt code for 3-drug combinations (psi on trifluoperazine)

```
*****
C                      ADAPT                      *
C                      Version 5                  *
C*****
C                      MODEL                      *
C                      *                          *
C This file contains Fortran subroutines into which the user *
C must enter the relevant model equations and constants.    *
C Consult the User's Guide for details concerning the format for *
C entered equations and definition of symbols.              *
C                                                         *
C 1. Symbol- Parameter symbols and model constants          *
C 2. DiffEq- System differential equations                  *
C 3. Output- System output equations                       *
C 4. Varmod- Error variance model equations                *
C 5. Covmod- Covariate model equations (ITS,MLEM)          *
C 6. Popinit- Population parameter initial values (ITS,MLEM) *
C 7. Prior - Parameter mean and covariance values (ID,NPD,STS) *
C 8. Sparam- Secondary parameters                          *
C 9. Amat - System state matrix                            *
C                                                         *
C*****
C#####C

Subroutine SYMBOL
Implicit None

Include 'globals.inc'
Include 'model.inc'

CC
C-----C
C Enter as Indicated C
C-----C

NDEqs = 0 ! Enter # of Diff. Eqs.
NSParam = 15 ! Enter # of System Parameters.
NVparam = 10 ! Enter # of Variance Parameters.
NSecPar = 0 ! Enter # of Secondary Parameters.
NSecOut = 0 ! Enter # of Secondary Outputs (not used).
Ieqsol = 3 ! Model type: 1 - DIFFEQ, 2 - AMAT, 3 - OUTPUT only.
Descr = ' three drug combinations psi on trifluoperazine '

CC
C-----C
C Enter Symbol for Each System Parameter (eg. Psym(1)='Kel') C
C-----C
Psym(1)='R0'
Psym(2)='psi'
Psym(3)='ImaxA'
Psym(4)='gA'
Psym(5)='IC50A'
Psym(6)='ImaxC'
```

```
Psym(7)='gC'  
Psym(8)='IC50C'  
Psym(9)='ImaxD'  
Psym(10)='gD'  
Psym(11)='IC50D'  
Psym(12)='R01'  
Psym(13)='R02'  
Psym(14)='R03'  
Psym(15)='psi2'
```

```
CC  
C-----C  
C   Enter Symbol for Each Variance Parameter {eg: PVsym(1)='Sigma'}   C  
C-----C  
    PVsym(1)='intercept'  
    PVsym(2)='sigma'  
    PVsym(3)='intercept2'  
    PVsym(4)='sigma2'  
    PVsym(5)='intercept3'  
    PVsym(6)='sigma3'  
    PVsym(7)='intercept4'  
    PVsym(8)='sigma4'  
    PVsym(9)='intercept5'  
    PVsym(10)='sigma5'
```

```
CC  
C-----C  
C   Enter Symbol for Each Secondary Parameter {eg: PSsym(1)='CLt'}   C  
C-----C  
C-----C  
C-----C  
C  
    Return  
    End
```

```
C#####C
```

```
Subroutine DIFFEQ(T,X,XP)  
Implicit None  
  
Include 'globals.inc'  
Include 'model.inc'  
  
Real*8 T,X(MaxNDE),XP(MaxNDE)
```

```
CC  
C-----C  
C   Enter Differential Equations Below {e.g. XP(1) = -P(1)*X(1)}   C  
C-----C  
  
C-----C  
C-----C
```

C

```
Return
End
```

C#####C

```
Subroutine OUTPUT(Y,T,X)
Implicit None
```

```
Include 'globals.inc'
Include 'model.inc'
```

```
Real*8 Y(MaxNOE),T,X(MaxNDE)
Real*8 R0, psi,A, C,ImaxA,ImaxC,gA,gC,IC50A,IC50C,R01,D,E
Real*8 G,H,ImaxD,gD,IC50D,R02,R03,psi2,psi3,AJ,DJ,CJ
```

```
C-----C
C Enter Output Equations Below {e.g. Y(1) = X(1)/P(2) } C
C-----C
```

```
R0=P(1)
psi=P(2)
ImaxA=P(3)
gA=P(4)
IC50A=P(5)
ImaxC=P(6)
gC=P(7)
IC50C=P(8)
ImaxD=P(9)
gD=P(10)
IC50D=P(11)
R01=P(12)
R02=P(13)
R03=P(14)
psi2=P(15)
```

C---Drug concentrations used to assess the interaction are in the columns 5, 6 and 7

C---Competitive inhibition

```
A=((obsdat(curON,5)**gA)/((psi*IC50A)**gA)
C=((obsdat(curON,6)**gC)/((IC50C)**gC)
D=((obsdat(curON,7)**gD)/((IC50D)**gD)
```

C---Joint inhibition

```
AJ=((obsdat(curON,5)**gA)/((psi2*IC50A)**gA+(obsdat(curON,5)**gA)
CJ=((obsdat(curON,6)**gC)/((IC50C)**gC+(obsdat(curON,6)**gC)
DJ=((obsdat(curON,7)**gD)/((IC50D)**gD+(obsdat(curON,7)**gD)
```

C---Concentrations used to assess concentration-response curves for each drug are in the columns 8, 9 and 10

```
E=(obsdat(curON,8))
G=(obsdat(curON,9))
H=(obsdat(curON,10))
```

C---Trifluoperazine (number of cells for concentration-response curve of Trifluoperazine is in column 2)

$$Y(2) = R01*(1-((ImaxA*(E**gA))/(IC50A**gA+E**gA)))$$

C---Gemcitabine (number of cells for concentration-response curve of Gemcitabine is in column 3)

$$Y(3)= R02*(1-((ImaxC*(G**gC))/(IC50C**gC+G**gC)))$$

C---paclitaxel (number of cells for concentration-response curve of Paclitaxel is in column 4)

$$Y(4)=R03*(1-((ImaxD*(H**gD))/(IC50D**gD+H**gD)))$$

C--- (percentage of cells for the 3-drug combination is in duplicate in column 1 and 11 (same data, but different equations for the fitting), column 1 is used for the competitive inhibition equation and the column 11 is used for the joint inhibition equation)

C---Competitive inhibition

$$Y(1) = R0*(1-(ImaxA*A+ImaxC*C+ImaxD*D)/(1+A+C+D))$$

C---Joint inhibition

$$Y(11) = R0*(1-(ImaxA*AJ))*(1-(ImaxC*CJ))*(1-(ImaxD*DJ))$$

Y(5)=1  
Y(6)=1  
Y(7)=1  
Y(8)=1  
Y(9)=1  
Y(10)=1

C-----C  
C-----C  
C

Return  
End

C#####C

Subroutine VARMOD(V,T,X,Y)  
Implicit None

Include 'globals.inc'  
Include 'model.inc'

Real\*8 V(MaxNOE),T,X(MaxNDE),Y(MaxNOE)  
real\*8 sigma, intercept,sigma2, intercept2,sigma3, intercept3  
real\*8 sigma4,intercept4,sigma5,intercept5

CC  
C-----C  
C Enter Variance Model Equations Below C  
C {e.g. V(1) = (PV(1) + PV(2)\*Y(1))\*\*2 } C  
C-----C

intercept=PV(1)  
sigma=PV(2)

```

    intercept2=PV(3)
    sigma2=PV(4)
    intercept3=PV(5)
    sigma3=PV(6)
    intercept4=PV(7)
    sigma4=PV(8)
    intercept5=PV(9)
    sigma5=PV(10)
V(1) = (PV(1) + PV(2)*Y(1))**2
V(2)=(PV(3) + PV(4)*Y(2))**2
V(3)=(PV(5) + PV(6)*Y(3))**2
V(4)=(PV(7) + PV(8)*Y(4))**2
V(5)=1
V(6)=1
V(7)=1
V(8)=1
V(9)=1
V(10)=1
V(11) = (PV(9) + PV(10)*Y(11))**2

```

```

C-----C
C-----C
C

```

```

    Return
    End

```

```

C#####C

```

```

    Subroutine COVMOD(Pmean, ICmean, PC)
C Defines any covariate model equations (MLEM, ITS)
    Implicit None

```

```

    Include 'globals.inc'
    Include 'model.inc'

```

```

    Real*8 PC(MaxNCP)
    Real*8 Pmean(MaxNSP+MaxNDE), ICmean(MaxNDE)

```

```

CC
C-----C
C   Enter # of Covariate Parameters                               C
C-----C

```

```

    NCparam = 0    ! Enter # of Covariate Parameters.

```

```

CC
C-----C
C   Enter Symbol for Covariate Params {eg: PCsym(1)='CLRrenal'}   C
C-----C

```

```

CC
C-----C
C   For the Model Params. that Depend on Covariates Enter the Equation C
C   {e.g. Pmean(1) = PC(1)*R(2) }                                   C
C-----C

```

```

C-----C
C-----C
C
    Return
    End

C#####C

    Subroutine POPINIT(PmeanI,ICmeanI,PcovI,ICcovI, PCI)
C Initial parameter values for population program parameters (ITS, MLEM)

    Implicit None

    Include 'globals.inc'
    Include 'model.inc'

    Integer I,J
    Real*8 PmeanI(MaxNSP+MaxNDE), ICmeanI(MaxNDE)
    Real*8 PcovI(MaxNSP+MaxNDE,MaxNSP+MaxNDE), ICcovI(MaxNDE,MaxNDE)
    Real*8 PCI(MaxNCP)

CC
C-----C
C Enter Initial Values for Population Means C
C { e.g. PmeanI(1) = 10.0 } C
C-----C

CC
C-----C
C Enter Initial Values for Pop. Covariance Matrix (Lower Triang.) C
C { e.g. PcovI(2,1) = 0.25 } C
C-----C

CC
C-----C
C Enter Values for Covariate Model Parameters C
C { e.g. PCI(1) = 2.0 } C
C-----C

C-----C
C-----C
C
    Return
    End

C#####C

    Subroutine PRIOR(Pmean,Pcov,ICmean,ICcov)
C Parameter mean and covariance values for MAP estimation (ID,NPD,STS)
    Implicit None

    Include 'globals.inc'
    Include 'model.inc'

    Integer I,J

```

```

Real*8 Pmean(MaxNSP+MaxNDE), ICmean(MaxNDE)
Real*8 Pcov(MaxNSP+MaxNDE,MaxNSP+MaxNDE), ICcov(MaxNDE,MaxNDE)

CC
C-----C
C   Enter Nonzero Elements of Prior Mean Vector           C
C       { e.g. Pmean(1) = 10.0   }                       C
C-----C

CC
C-----C
C   Enter Nonzero Elements of Covariance Matrix (Lower Triang.) C
C       { e.g. Pcov(2,1) = 0.25   }                       C
C-----C

C-----C
C-----C
C
Return
End

C#####C

Subroutine SPARAM(PS,P,IC)
Implicit None

Include 'globals.inc'

Real*8 PS(MaxNSECP), P(MaxNSP+MaxNDE), IC(MaxNDE)

CC
C-----C
C   Enter Equations Defining Secondary Paramters         C
C       { e.g. PS(1) = P(1)*P(2)   }                     C
C-----C

C-----C
C-----C
C
Return
End

C#####C

Subroutine AMAT(A)
Implicit None

Include 'globals.inc'
Include 'model.inc'

Integer I,J
Real*8 A(MaxNDE,MaxNDE)

DO I=1,Ndeqs
  Do J=1,Ndeqs

```



```
        A(I,J)=0.0D0
      End Do
    End Do
```

```
CC
C-----C
C  Enter non zero elements of state matrix {e.g. A(1,1) = -P(1) }  C
C-----C
```

```
C-----C
C-----C
C
```

```
      Return
    End
```

```
C#####C
```

0  
0  
0  
11  
124

|    |            |           |           |           |              |           |          |           |           |           |            |
|----|------------|-----------|-----------|-----------|--------------|-----------|----------|-----------|-----------|-----------|------------|
| 1  | 40.508058  | -1.000000 | -1.000000 | -1.000000 | 4768.000000  | 10.160000 | 5.155000 | -1.000000 | -1.000000 | -1.000000 | 40.508058  |
| 2  | 39.598926  | -1.000000 | -1.000000 | -1.000000 | 4768.000000  | 10.160000 | 5.155000 | -1.000000 | -1.000000 | -1.000000 | 39.598926  |
| 3  | 39.581707  | -1.000000 | -1.000000 | -1.000000 | 4768.000000  | 10.160000 | 5.155000 | -1.000000 | -1.000000 | -1.000000 | 39.581707  |
| 4  | 33.327976  | -1.000000 | -1.000000 | -1.000000 | 4768.000000  | 10.160000 | 6.467000 | -1.000000 | -1.000000 | -1.000000 | 33.327976  |
| 5  | 32.480830  | -1.000000 | -1.000000 | -1.000000 | 4768.000000  | 10.160000 | 6.467000 | -1.000000 | -1.000000 | -1.000000 | 32.480830  |
| 6  | 25.417834  | -1.000000 | -1.000000 | -1.000000 | 4768.000000  | 10.160000 | 7.800000 | -1.000000 | -1.000000 | -1.000000 | 25.417834  |
| 7  | 23.957712  | -1.000000 | -1.000000 | -1.000000 | 4768.000000  | 10.160000 | 7.800000 | -1.000000 | -1.000000 | -1.000000 | 23.957712  |
| 8  | 26.795307  | -1.000000 | -1.000000 | -1.000000 | 4768.000000  | 10.160000 | 7.800000 | -1.000000 | -1.000000 | -1.000000 | 26.795307  |
| 9  | 33.176454  | -1.000000 | -1.000000 | -1.000000 | 8123.000000  | 10.160000 | 5.155000 | -1.000000 | -1.000000 | -1.000000 | 33.176454  |
| 10 | 40.380642  | -1.000000 | -1.000000 | -1.000000 | 8123.000000  | 10.160000 | 5.155000 | -1.000000 | -1.000000 | -1.000000 | 40.380642  |
| 11 | 40.143028  | -1.000000 | -1.000000 | -1.000000 | 8123.000000  | 10.160000 | 5.155000 | -1.000000 | -1.000000 | -1.000000 | 40.143028  |
| 12 | 30.049589  | -1.000000 | -1.000000 | -1.000000 | 8123.000000  | 10.160000 | 6.467000 | -1.000000 | -1.000000 | -1.000000 | 30.049589  |
| 13 | 29.309197  | -1.000000 | -1.000000 | -1.000000 | 8123.000000  | 10.160000 | 6.467000 | -1.000000 | -1.000000 | -1.000000 | 29.309197  |
| 14 | 32.367189  | -1.000000 | -1.000000 | -1.000000 | 8123.000000  | 10.160000 | 6.467000 | -1.000000 | -1.000000 | -1.000000 | 32.367189  |
| 15 | 25.335185  | -1.000000 | -1.000000 | -1.000000 | 8123.000000  | 10.160000 | 7.800000 | -1.000000 | -1.000000 | -1.000000 | 25.335185  |
| 16 | 26.602461  | -1.000000 | -1.000000 | -1.000000 | 8123.000000  | 10.160000 | 7.800000 | -1.000000 | -1.000000 | -1.000000 | 26.602461  |
| 17 | 27.267092  | -1.000000 | -1.000000 | -1.000000 | 8123.000000  | 10.160000 | 7.800000 | -1.000000 | -1.000000 | -1.000000 | 27.267092  |
| 18 | 27.036365  | -1.000000 | -1.000000 | -1.000000 | 12620.000000 | 10.160000 | 5.155000 | -1.000000 | -1.000000 | -1.000000 | 27.036365  |
| 19 | 26.402727  | -1.000000 | -1.000000 | -1.000000 | 12620.000000 | 10.160000 | 5.155000 | -1.000000 | -1.000000 | -1.000000 | 26.402727  |
| 20 | 27.676891  | -1.000000 | -1.000000 | -1.000000 | 12620.000000 | 10.160000 | 5.155000 | -1.000000 | -1.000000 | -1.000000 | 27.676891  |
| 21 | 23.392947  | -1.000000 | -1.000000 | -1.000000 | 12620.000000 | 10.160000 | 6.467000 | -1.000000 | -1.000000 | -1.000000 | 23.392947  |
| 22 | 24.267643  | -1.000000 | -1.000000 | -1.000000 | 12620.000000 | 10.160000 | 6.467000 | -1.000000 | -1.000000 | -1.000000 | 24.267643  |
| 23 | 25.107902  | -1.000000 | -1.000000 | -1.000000 | 12620.000000 | 10.160000 | 6.467000 | -1.000000 | -1.000000 | -1.000000 | 25.107902  |
| 24 | 24.277974  | -1.000000 | -1.000000 | -1.000000 | 12620.000000 | 10.160000 | 7.800000 | -1.000000 | -1.000000 | -1.000000 | 24.277974  |
| 25 | 23.764865  | -1.000000 | -1.000000 | -1.000000 | 12620.000000 | 10.160000 | 7.800000 | -1.000000 | -1.000000 | -1.000000 | 23.764865  |
| 26 | 22.490702  | -1.000000 | -1.000000 | -1.000000 | 12620.000000 | 10.160000 | 7.800000 | -1.000000 | -1.000000 | -1.000000 | 22.490702  |
| 27 | 99.684329  | -1.000000 | -1.000000 | -1.000000 | 0.000000     | 0.000000  | 0.000000 | -1.000000 | -1.000000 | -1.000000 | 99.684329  |
| 28 | 99.370954  | -1.000000 | -1.000000 | -1.000000 | 0.000000     | 0.000000  | 0.000000 | -1.000000 | -1.000000 | -1.000000 | 99.370954  |
| 29 | 100.944717 | -1.000000 | -1.000000 | -1.000000 | 0.000000     | 0.000000  | 0.000000 | -1.000000 | -1.000000 | -1.000000 | 100.944717 |
| 30 | 34.137113  | -1.000000 | -1.000000 | -1.000000 | 4768.000000  | 14.900000 | 5.155000 | -1.000000 | -1.000000 | -1.000000 | 34.137113  |
| 31 | 33.665798  | -1.000000 | -1.000000 | -1.000000 | 4768.000000  | 14.900000 | 5.155000 | -1.000000 | -1.000000 | -1.000000 | 33.665798  |
| 32 | 36.198284  | -1.000000 | -1.000000 | -1.000000 | 4768.000000  | 14.900000 | 5.155000 | -1.000000 | -1.000000 | -1.000000 | 36.198284  |
| 33 | 28.799973  | -1.000000 | -1.000000 | -1.000000 | 4768.000000  | 14.900000 | 6.467000 | -1.000000 | -1.000000 | -1.000000 | 28.799973  |
| 34 | 28.428232  | -1.000000 | -1.000000 | -1.000000 | 4768.000000  | 14.900000 | 6.467000 | -1.000000 | -1.000000 | -1.000000 | 28.428232  |
| 35 | 29.666263  | -1.000000 | -1.000000 | -1.000000 | 4768.000000  | 14.900000 | 6.467000 | -1.000000 | -1.000000 | -1.000000 | 29.666263  |
| 36 | 22.948371  | -1.000000 | -1.000000 | -1.000000 | 4768.000000  | 14.900000 | 7.800000 | -1.000000 | -1.000000 | -1.000000 | 22.948371  |

|    |            |           |           |           |              |           |          |           |           |           |            |
|----|------------|-----------|-----------|-----------|--------------|-----------|----------|-----------|-----------|-----------|------------|
| 37 | 22.818926  | -1.000000 | -1.000000 | -1.000000 | 4768.000000  | 14.900000 | 7.800000 | -1.000000 | -1.000000 | -1.000000 | 22.818926  |
| 38 | 24.362315  | -1.000000 | -1.000000 | -1.000000 | 4768.000000  | 14.900000 | 7.800000 | -1.000000 | -1.000000 | -1.000000 | 24.362315  |
| 39 | 29.888644  | -1.000000 | -1.000000 | -1.000000 | 8123.000000  | 14.900000 | 5.155000 | -1.000000 | -1.000000 | -1.000000 | 29.888644  |
| 40 | 29.619795  | -1.000000 | -1.000000 | -1.000000 | 8123.000000  | 14.900000 | 5.155000 | -1.000000 | -1.000000 | -1.000000 | 29.619795  |
| 41 | 28.381765  | -1.000000 | -1.000000 | -1.000000 | 8123.000000  | 14.900000 | 5.155000 | -1.000000 | -1.000000 | -1.000000 | 28.381765  |
| 42 | 26.599399  | -1.000000 | -1.000000 | -1.000000 | 8123.000000  | 14.900000 | 6.467000 | -1.000000 | -1.000000 | -1.000000 | 26.599399  |
| 43 | 27.010970  | -1.000000 | -1.000000 | -1.000000 | 8123.000000  | 14.900000 | 6.467000 | -1.000000 | -1.000000 | -1.000000 | 27.010970  |
| 44 | 26.194467  | -1.000000 | -1.000000 | -1.000000 | 8123.000000  | 14.900000 | 6.467000 | -1.000000 | -1.000000 | -1.000000 | 26.194467  |
| 45 | 20.817498  | -1.000000 | -1.000000 | -1.000000 | 8123.000000  | 14.900000 | 7.800000 | -1.000000 | -1.000000 | -1.000000 | 20.817498  |
| 46 | 20.110527  | -1.000000 | -1.000000 | -1.000000 | 8123.000000  | 14.900000 | 7.800000 | -1.000000 | -1.000000 | -1.000000 | 20.110527  |
| 47 | 18.839305  | -1.000000 | -1.000000 | -1.000000 | 8123.000000  | 14.900000 | 7.800000 | -1.000000 | -1.000000 | -1.000000 | 18.839305  |
| 48 | 22.799011  | -1.000000 | -1.000000 | -1.000000 | 12620.000000 | 14.900000 | 5.155000 | -1.000000 | -1.000000 | -1.000000 | 22.799011  |
| 49 | 22.666246  | -1.000000 | -1.000000 | -1.000000 | 12620.000000 | 14.900000 | 5.155000 | -1.000000 | -1.000000 | -1.000000 | 22.666246  |
| 50 | 22.958328  | -1.000000 | -1.000000 | -1.000000 | 12620.000000 | 14.900000 | 5.155000 | -1.000000 | -1.000000 | -1.000000 | 22.958328  |
| 51 | 22.520205  | -1.000000 | -1.000000 | -1.000000 | 12620.000000 | 14.900000 | 6.467000 | -1.000000 | -1.000000 | -1.000000 | 22.520205  |
| 52 | 20.127122  | -1.000000 | -1.000000 | -1.000000 | 12620.000000 | 14.900000 | 6.467000 | -1.000000 | -1.000000 | -1.000000 | 20.127122  |
| 53 | 19.373683  | -1.000000 | -1.000000 | -1.000000 | 12620.000000 | 14.900000 | 6.467000 | -1.000000 | -1.000000 | -1.000000 | 19.373683  |
| 54 | 18.527308  | -1.000000 | -1.000000 | -1.000000 | 12620.000000 | 14.900000 | 7.800000 | -1.000000 | -1.000000 | -1.000000 | 18.527308  |
| 55 | 19.051728  | -1.000000 | -1.000000 | -1.000000 | 12620.000000 | 14.900000 | 7.800000 | -1.000000 | -1.000000 | -1.000000 | 19.051728  |
| 56 | 19.383640  | -1.000000 | -1.000000 | -1.000000 | 12620.000000 | 14.900000 | 7.800000 | -1.000000 | -1.000000 | -1.000000 | 19.383640  |
| 57 | 99.985064  | -1.000000 | -1.000000 | -1.000000 | 0.000000     | 0.000000  | 0.000000 | -1.000000 | -1.000000 | -1.000000 | 99.985064  |
| 58 | 99.971788  | -1.000000 | -1.000000 | -1.000000 | 0.000000     | 0.000000  | 0.000000 | -1.000000 | -1.000000 | -1.000000 | 99.971788  |
| 59 | 100.028212 | -1.000000 | -1.000000 | -1.000000 | 0.000000     | 0.000000  | 0.000000 | -1.000000 | -1.000000 | -1.000000 | 100.028212 |
| 60 | 27.372393  | -1.000000 | -1.000000 | -1.000000 | 4768.000000  | 20.460000 | 5.155000 | -1.000000 | -1.000000 | -1.000000 | 27.372393  |
| 61 | 31.597494  | -1.000000 | -1.000000 | -1.000000 | 4768.000000  | 20.460000 | 5.155000 | -1.000000 | -1.000000 | -1.000000 | 31.597494  |
| 62 | 29.529437  | -1.000000 | -1.000000 | -1.000000 | 4768.000000  | 20.460000 | 5.155000 | -1.000000 | -1.000000 | -1.000000 | 29.529437  |
| 63 | 25.831138  | -1.000000 | -1.000000 | -1.000000 | 4768.000000  | 20.460000 | 6.467000 | -1.000000 | -1.000000 | -1.000000 | 25.831138  |
| 64 | 25.051612  | -1.000000 | -1.000000 | -1.000000 | 4768.000000  | 20.460000 | 6.467000 | -1.000000 | -1.000000 | -1.000000 | 25.051612  |
| 65 | 27.319000  | -1.000000 | -1.000000 | -1.000000 | 4768.000000  | 20.460000 | 6.467000 | -1.000000 | -1.000000 | -1.000000 | 27.319000  |
| 66 | 20.833630  | -1.000000 | -1.000000 | -1.000000 | 4768.000000  | 20.460000 | 7.800000 | -1.000000 | -1.000000 | -1.000000 | 20.833630  |
| 67 | 22.495907  | -1.000000 | -1.000000 | -1.000000 | 4768.000000  | 20.460000 | 7.800000 | -1.000000 | -1.000000 | -1.000000 | 22.495907  |
| 68 | 21.214494  | -1.000000 | -1.000000 | -1.000000 | 4768.000000  | 20.460000 | 7.800000 | -1.000000 | -1.000000 | -1.000000 | 21.214494  |
| 69 | 25.140599  | -1.000000 | -1.000000 | -1.000000 | 8123.000000  | 20.460000 | 5.155000 | -1.000000 | -1.000000 | -1.000000 | 25.140599  |
| 70 | 26.457607  | -1.000000 | -1.000000 | -1.000000 | 8123.000000  | 20.460000 | 5.155000 | -1.000000 | -1.000000 | -1.000000 | 26.457607  |
| 71 | 24.086994  | -1.000000 | -1.000000 | -1.000000 | 8123.000000  | 20.460000 | 5.155000 | -1.000000 | -1.000000 | -1.000000 | 24.086994  |
| 72 | 22.606250  | -1.000000 | -1.000000 | -1.000000 | 8123.000000  | 20.460000 | 6.467000 | -1.000000 | -1.000000 | -1.000000 | 22.606250  |
| 73 | 21.150424  | -1.000000 | -1.000000 | -1.000000 | 8123.000000  | 20.460000 | 6.467000 | -1.000000 | -1.000000 | -1.000000 | 21.150424  |
| 74 | 22.713035  | -1.000000 | -1.000000 | -1.000000 | 8123.000000  | 20.460000 | 6.467000 | -1.000000 | -1.000000 | -1.000000 | 22.713035  |
| 75 | 19.584253  | -1.000000 | -1.000000 | -1.000000 | 8123.000000  | 20.460000 | 7.800000 | -1.000000 | -1.000000 | -1.000000 | 19.584253  |
| 76 | 20.780238  | -1.000000 | -1.000000 | -1.000000 | 8123.000000  | 20.460000 | 7.800000 | -1.000000 | -1.000000 | -1.000000 | 20.780238  |
| 77 | 20.545312  | -1.000000 | -1.000000 | -1.000000 | 8123.000000  | 20.460000 | 7.800000 | -1.000000 | -1.000000 | -1.000000 | 20.545312  |

|     |            |             |                |               |              |           |           |              |           |           |            |
|-----|------------|-------------|----------------|---------------|--------------|-----------|-----------|--------------|-----------|-----------|------------|
| 78  | 20.705489  | -1.000000   | -1.000000      | -1.000000     | 12620.000000 | 20.460000 | 5.155000  | -1.000000    | -1.000000 | -1.000000 | 20.705489  |
| 79  | 26.276073  | -1.000000   | -1.000000      | -1.000000     | 12620.000000 | 20.460000 | 5.155000  | -1.000000    | -1.000000 | -1.000000 | 26.276073  |
| 80  | 23.364419  | -1.000000   | -1.000000      | -1.000000     | 12620.000000 | 20.460000 | 5.155000  | -1.000000    | -1.000000 | -1.000000 | 23.364419  |
| 81  | 19.011177  | -1.000000   | -1.000000      | -1.000000     | 12620.000000 | 20.460000 | 6.467000  | -1.000000    | -1.000000 | -1.000000 | 19.011177  |
| 82  | 19.616288  | -1.000000   | -1.000000      | -1.000000     | 12620.000000 | 20.460000 | 6.467000  | -1.000000    | -1.000000 | -1.000000 | 19.616288  |
| 83  | 20.474123  | -1.000000   | -1.000000      | -1.000000     | 12620.000000 | 20.460000 | 6.467000  | -1.000000    | -1.000000 | -1.000000 | 20.474123  |
| 84  | 14.935573  | -1.000000   | -1.000000      | -1.000000     | 12620.000000 | 20.460000 | 7.800000  | -1.000000    | -1.000000 | -1.000000 | 14.935573  |
| 85  | 18.591158  | -1.000000   | -1.000000      | -1.000000     | 12620.000000 | 20.460000 | 7.800000  | -1.000000    | -1.000000 | -1.000000 | 18.591158  |
| 86  | 19.246102  | -1.000000   | -1.000000      | -1.000000     | 12620.000000 | 20.460000 | 7.800000  | -1.000000    | -1.000000 | -1.000000 | 19.246102  |
| 87  | 98.138393  | -1.000000   | -1.000000      | -1.000000     | 0.000000     | 0.000000  | 0.000000  | -1.000000    | -1.000000 | -1.000000 | 98.138393  |
| 88  | 98.202463  | -1.000000   | -1.000000      | -1.000000     | 0.000000     | 0.000000  | 0.000000  | -1.000000    | -1.000000 | -1.000000 | 98.202463  |
| 89  | 103.659144 | -1.000000   | -1.000000      | -1.000000     | 0.000000     | 0.000000  | 0.000000  | -1.000000    | -1.000000 | -1.000000 | 103.659144 |
| 90  | -1.000000  | 882944.4444 | -1.000000      | -1.000000     | -1.000000    | -1.000000 | -1.000000 | 4768.000000  | 0.000000  | 0.000000  | -1.000000  |
| 91  | -1.000000  | 900566.6666 | -1.000000      | -1.000000     | -1.000000    | -1.000000 | -1.000000 | 4768.000000  | 0.000000  | 0.000000  | -1.000000  |
| 92  | -1.000000  | 669566.6666 | -1.000000      | -1.000000     | -1.000000    | -1.000000 | -1.000000 | 8123.000000  | 0.000000  | 0.000000  | -1.000000  |
| 93  | -1.000000  | 688033.3333 | -1.000000      | -1.000000     | -1.000000    | -1.000000 | -1.000000 | 8123.000000  | 0.000000  | 0.000000  | -1.000000  |
| 94  | -1.000000  | 682866.6666 | -1.000000      | -1.000000     | -1.000000    | -1.000000 | -1.000000 | 8123.000000  | 0.000000  | 0.000000  | -1.000000  |
| 95  | -1.000000  | 440500.0000 | -1.000000      | -1.000000     | -1.000000    | -1.000000 | -1.000000 | 12620.000000 | 0.000000  | 0.000000  | -1.000000  |
| 96  | -1.000000  | 444466.6666 | -1.000000      | -1.000000     | -1.000000    | -1.000000 | -1.000000 | 12620.000000 | 0.000000  | 0.000000  | -1.000000  |
| 97  | -1.000000  | 432700.0000 | -1.000000      | -1.000000     | -1.000000    | -1.000000 | -1.000000 | 12620.000000 | 0.000000  | 0.000000  | -1.000000  |
| 98  | -1.000000  | 1010850.000 | -1.000000      | -1.000000     | -1.000000    | -1.000000 | -1.000000 | 0.000000     | 0.000000  | 0.000000  | -1.000000  |
| 99  | -1.000000  | 1018800.000 | -1.000000      | -1.000000     | -1.000000    | -1.000000 | -1.000000 | 0.000000     | 0.000000  | 0.000000  | -1.000000  |
| 100 | -1.000000  | 1042100.000 | -1.000000      | -1.000000     | -1.000000    | -1.000000 | -1.000000 | 0.000000     | 0.000000  | 0.000000  | -1.000000  |
| 101 | -1.000000  | -1.000000   | 847366.666667  | -1.000000     | -1.000000    | -1.000000 | -1.000000 | 0.000000     | 10.160000 | 0.000000  | -1.000000  |
| 102 | -1.000000  | -1.000000   | 873266.666667  | -1.000000     | -1.000000    | -1.000000 | -1.000000 | 0.000000     | 10.160000 | 0.000000  | -1.000000  |
| 103 | -1.000000  | -1.000000   | 882033.333333  | -1.000000     | -1.000000    | -1.000000 | -1.000000 | 0.000000     | 10.160000 | 0.000000  | -1.000000  |
| 104 | -1.000000  | -1.000000   | 626566.666667  | -1.000000     | -1.000000    | -1.000000 | -1.000000 | 0.000000     | 14.900000 | 0.000000  | -1.000000  |
| 105 | -1.000000  | -1.000000   | 627900.000000  | -1.000000     | -1.000000    | -1.000000 | -1.000000 | 0.000000     | 14.900000 | 0.000000  | -1.000000  |
| 106 | -1.000000  | -1.000000   | 611433.333333  | -1.000000     | -1.000000    | -1.000000 | -1.000000 | 0.000000     | 14.900000 | 0.000000  | -1.000000  |
| 107 | -1.000000  | -1.000000   | 409500.000000  | -1.000000     | -1.000000    | -1.000000 | -1.000000 | 0.000000     | 20.460000 | 0.000000  | -1.000000  |
| 108 | -1.000000  | -1.000000   | 440000.000000  | -1.000000     | -1.000000    | -1.000000 | -1.000000 | 0.000000     | 20.460000 | 0.000000  | -1.000000  |
| 109 | -1.000000  | -1.000000   | 430100.000000  | -1.000000     | -1.000000    | -1.000000 | -1.000000 | 0.000000     | 20.460000 | 0.000000  | -1.000000  |
| 110 | -1.000000  | -1.000000   | 997444.444444  | -1.000000     | -1.000000    | -1.000000 | -1.000000 | 0.000000     | 0.000000  | 0.000000  | -1.000000  |
| 111 | -1.000000  | -1.000000   | 1035866.666667 | -1.000000     | -1.000000    | -1.000000 | -1.000000 | 0.000000     | 0.000000  | 0.000000  | -1.000000  |
| 112 | -1.000000  | -1.000000   | 1024966.666667 | -1.000000     | -1.000000    | -1.000000 | -1.000000 | 0.000000     | 0.000000  | 0.000000  | -1.000000  |
| 113 | -1.000000  | -1.000000   | -1.000000      | 766333.333333 | -1.000000    | -1.000000 | -1.000000 | 0.000000     | 0.000000  | 5.155000  | -1.000000  |
| 114 | -1.000000  | -1.000000   | -1.000000      | 778166.666667 | -1.000000    | -1.000000 | -1.000000 | 0.000000     | 0.000000  | 5.155000  | -1.000000  |
| 115 | -1.000000  | -1.000000   | -1.000000      | 769166.666667 | -1.000000    | -1.000000 | -1.000000 | 0.000000     | 0.000000  | 5.155000  | -1.000000  |
| 116 | -1.000000  | -1.000000   | -1.000000      | 567166.666667 | -1.000000    | -1.000000 | -1.000000 | 0.000000     | 0.000000  | 6.467000  | -1.000000  |
| 117 | -1.000000  | -1.000000   | -1.000000      | 560333.333333 | -1.000000    | -1.000000 | -1.000000 | 0.000000     | 0.000000  | 6.467000  | -1.000000  |
| 118 | -1.000000  | -1.000000   | -1.000000      | 595866.666667 | -1.000000    | -1.000000 | -1.000000 | 0.000000     | 0.000000  | 6.467000  | -1.000000  |

|     |           |           |           |                |           |           |           |          |          |          |           |
|-----|-----------|-----------|-----------|----------------|-----------|-----------|-----------|----------|----------|----------|-----------|
| 119 | -1.000000 | -1.000000 | -1.000000 | 343366.666667  | -1.000000 | -1.000000 | -1.000000 | 0.000000 | 0.000000 | 7.800000 | -1.000000 |
| 120 | -1.000000 | -1.000000 | -1.000000 | 368683.333333  | -1.000000 | -1.000000 | -1.000000 | 0.000000 | 0.000000 | 7.800000 | -1.000000 |
| 121 | -1.000000 | -1.000000 | -1.000000 | 341466.666667  | -1.000000 | -1.000000 | -1.000000 | 0.000000 | 0.000000 | 7.800000 | -1.000000 |
| 122 | -1.000000 | -1.000000 | -1.000000 | 934700.000000  | -1.000000 | -1.000000 | -1.000000 | 0.000000 | 0.000000 | 0.000000 | -1.000000 |
| 123 | -1.000000 | -1.000000 | -1.000000 | 1001666.666667 | -1.000000 | -1.000000 | -1.000000 | 0.000000 | 0.000000 | 0.000000 | -1.000000 |
| 124 | -1.000000 | -1.000000 | -1.000000 | 1012433.333333 | -1.000000 | -1.000000 | -1.000000 | 0.000000 | 0.000000 | 0.000000 | -1.000000 |
